# Supplementary material
Source: HighWire-hosted journal article supplement (https://srh.bmj.com/content/bmjsrh-2018-200184)
Supplement: inline-supplementary-material-1 [file inline-supplementary-material-1.pdf]

## Supplementary material

### 1. Search Strategy

Articles that discussed the following three themes together were included:

Theme 1: Gender development: one of the gender development marker like women education, employment, and gender-based violence, representation of women in leadership position or parliament; theme 2: Contraception; theme 3: outcome from maternal or under-five child mortality.

In the end, the search words for all three themes were connected by Boolean search operator, “AND” and restricted to English-only publications from the year 2000 to 2017. A similar search strategy was developed for MEDLINE, EMBASE, PsycINFO, and CINAHL.

An example of keywords used were:

| Theme 1<br>Gender Development                                                                                                                                                                                                                                                                                                                                                                                                                  | Theme 2<br>Contraception                                                                                                                                                                                                                                                                                                                                                                                                                                                                                                                                                                                 | Theme 3<br>Maternal and Child<br>Mortality                                                                                                                                                                                    |
|------------------------------------------------------------------------------------------------------------------------------------------------------------------------------------------------------------------------------------------------------------------------------------------------------------------------------------------------------------------------------------------------------------------------------------------------|----------------------------------------------------------------------------------------------------------------------------------------------------------------------------------------------------------------------------------------------------------------------------------------------------------------------------------------------------------------------------------------------------------------------------------------------------------------------------------------------------------------------------------------------------------------------------------------------------------|-------------------------------------------------------------------------------------------------------------------------------------------------------------------------------------------------------------------------------|
| (contracep* adj3 (women or girl* or female*), Contraception Behaviour or Contraception, Barrier or Contraception, Postcoital , family planning or Family Planning Services, natural family planning or Natural Family Planning Methods, (contracept* adj3 withdrawal method), (tubal ligation or tubectomy or vasectomy), (contracep* adj3 permanent method*), condom*, (contracep* adj3 long acting), (contracep* adj3 agents), birth control | Gender development, Women's Rights or Socioeconomic Factors or gender equality, Sexism, ((female* or women or girl*) adj3 empower*), (mainstream* adj3 gender), Domestic Violence or Spouse Abuse or Battered Women or Sex Offenses or gender based violence, Intimate Partner Violence, (educat* adj3 (girl* or women or female*)), (literacy rate adj3 (women or girl* or Female*)), (education* status adj3 (women or girl* or Female*)), (primary education adj3 (women or girl* or female*)), (secondary education adj3 (women or girl* or female*)), (mean years of schooling adj3 (women or girl* | Maternal Mortality or maternal death*, maternal mortality rate, perinatal mortality or Infant Mortality or Fetal Death or Perinatal Mortality, Stillbirth, neonatal death, child death, child mortality, under five mortality |

|  |                                                                                                                                                                                                                                                                                                          |  |
|--|----------------------------------------------------------------------------------------------------------------------------------------------------------------------------------------------------------------------------------------------------------------------------------------------------------|--|
|  | or female*)), mean years of schooling, (literacy adj3 (women or girl* or Female*)), (econom* adj3 (women or girl* or female*)), gender development index, (politic* adj3 (women or female*)), ((women or female*) adj3 representation adj3 politic*), ((women or female*) adj3 member* adj3 parliament), |  |
|--|----------------------------------------------------------------------------------------------------------------------------------------------------------------------------------------------------------------------------------------------------------------------------------------------------------|--|

## 2. Example search strategy- Medline search results:

| #  | Searches                                                                                                                                                                                                                                                                                                 | Results |
|----|----------------------------------------------------------------------------------------------------------------------------------------------------------------------------------------------------------------------------------------------------------------------------------------------------------|---------|
| 1  | (contracep* adj3 (women or girl* or female*)).mp. [mp=title, abstract, original title, name of substance word, subject heading word, keyword heading word, protocol supplementary concept word, rare disease supplementary concept word, unique identifier, synonyms]                                    | 19755   |
| 2  | Contraception Behavior/ or Contraception, Barrier/ or Contraception/ or Contraception, Postcoital/ or contraception.mp.                                                                                                                                                                                  | 48576   |
| 3  | family planning.mp. or Family Planning Services/                                                                                                                                                                                                                                                         | 49281   |
| 4  | natural family planning.mp. or Natural Family Planning Methods/                                                                                                                                                                                                                                          | 1052    |
| 5  | (contracept* adj3 withdrawal method).mp. [mp=title, abstract, original title, name of substance word, subject heading word, keyword heading word, protocol supplementary concept word, rare disease supplementary concept word, unique identifier, synonyms]                                             | 6       |
| 6  | (tubal ligation or tubectomy or vasectomy).mp. [mp=title, abstract, original title, name of substance word, subject heading word, keyword heading word, protocol supplementary concept word, rare disease supplementary concept word, unique identifier, synonyms]                                       | 7285    |
| 7  | (contracept* adj3 permanent method*).mp. [mp=title, abstract, original title, name of substance word, subject heading word, keyword heading word, protocol supplementary concept word, rare disease supplementary concept word, unique identifier, synonyms]                                             | 68      |
| 8  | condom.mp. or Condoms/                                                                                                                                                                                                                                                                                   | 18081   |
| 9  | (contracept* adj3 long acting).mp. [mp=title, abstract, original title, name of substance word, subject heading word, keyword heading word, protocol supplementary concept word, rare disease supplementary concept word, unique identifier, synonyms]                                                   | 1304    |
| 10 | (contracept* adj3 agents).mp. [mp=title, abstract, original title, name of substance word, subject heading word, keyword heading word, protocol supplementary concept word, rare disease supplementary concept word, unique identifier, synonyms]                                                        | 17359   |
| 11 | birth control.mp. or Contraception/                                                                                                                                                                                                                                                                      | 22724   |
| 12 | 1 or 2 or 3 or 4 or 5 or 6 or 7 or 8 or 9 or 10 or 11                                                                                                                                                                                                                                                    | 101039  |
| 13 | gender development.mp.                                                                                                                                                                                                                                                                                   | 167     |
| 14 | Women's Rights/ or Socioeconomic Factors/ or gender equality.mp.                                                                                                                                                                                                                                         | 154580  |
| 15 | sexism.mp. or Sexism/                                                                                                                                                                                                                                                                                    | 1691    |
| 16 | ((female* or women or girl*) adj3 empower*).mp. [mp=title, abstract, original title, name of substance word, subject heading word, keyword heading word, protocol supplementary concept word, rare disease supplementary concept word, unique identifier, synonyms]                                      | 1450    |
| 17 | (mainstream* adj3 gender).mp. [mp=title, abstract, original title, name of substance word, subject heading word, keyword heading word, protocol supplementary concept word, rare disease supplementary concept word, unique identifier, synonyms]                                                        | 102     |
| 18 | Domestic Violence/ or Spouse Abuse/ or Battered Women/ or Sex Offenses/ or gender based violence.mp.                                                                                                                                                                                                     | 21449   |
| 19 | intimate partner violence.mp. or Intimate Partner Violence/                                                                                                                                                                                                                                              | 6141    |
| 20 | (educat* adj3 (girl* or women or female*)).mp. [mp=title, abstract, original title, name of substance word, subject heading word, keyword heading word, protocol supplementary concept word, rare disease supplementary concept word, unique identifier, synonyms]                                       | 10187   |
| 21 | ((literacy rate adj3 (women or girl* or Female*)).mp. [mp=title, abstract, original title, name of substance word, subject heading word, keyword heading word, protocol supplementary concept word, rare disease supplementary concept word, unique identifier, synonyms]                                | 69      |
| 22 | (education* status adj3 (women or girl* or Female*)).mp. [mp=title, abstract, original title, name of substance word, subject heading word, keyword heading word, protocol supplementary concept word, rare disease supplementary concept word, unique identifier, synonyms]                             | 666     |
| 23 | (primary education adj3 (women or girl* or female*)).mp. [mp=title, abstract, original title, name of substance word, subject heading word, keyword heading word, protocol supplementary concept word, rare disease supplementary concept word, unique identifier, synonyms]                             | 113     |
| 24 | (secondary education adj3 (women or girl* or female*)).mp. [mp=title, abstract, original title, name of substance word, subject heading word, keyword heading word, protocol supplementary concept word, rare disease supplementary concept word, unique identifier, synonyms]                           | 127     |
| 25 | (mean years of schooling adj3 (women or girl* or female*)).mp. [mp=title, abstract, original title, name of substance word, subject heading word, keyword heading word, protocol supplementary concept word, rare disease supplementary concept word, unique identifier, synonyms]                       | 2       |
| 26 | mean years of schooling.mp.                                                                                                                                                                                                                                                                              | 31      |
| 27 | ((literacy adj3 (women or girl* or Female*)).mp. [mp=title, abstract, original title, name of substance word, subject heading word, keyword heading word, protocol supplementary concept word, rare disease supplementary concept word, unique identifier, synonyms]                                     | 471     |
| 28 | (econom* adj3 (women or girl* or female*)).mp. [mp=title, abstract, original title, name of substance word, subject heading word, keyword heading word, protocol supplementary concept word, rare disease supplementary concept word, unique identifier, synonyms]                                       | 1438    |
| 29 | ((labour participation or workforce or income) adj3 (women or girl* or female*)).mp. [mp=title, abstract, original title, name of substance word, subject heading word, keyword heading word, protocol supplementary concept word, rare disease supplementary concept word, unique identifier, synonyms] | 5096    |
| 30 | gender development index.mp.                                                                                                                                                                                                                                                                             | 18      |
| 31 | maternal mortality.mp. or Maternal Mortality/                                                                                                                                                                                                                                                            | 15166   |
| 32 | Maternal Mortality/ or maternal death*.mp.                                                                                                                                                                                                                                                               | 14155   |
| 33 | maternal mortality rate.mp.                                                                                                                                                                                                                                                                              | 880     |
| 34 | 31 or 32 or 33                                                                                                                                                                                                                                                                                           | 18315   |
| 35 | perinatal mortality.mp. or Infant Mortality/ or Fetal Death/ or Perinatal Mortality/                                                                                                                                                                                                                     | 55847   |
| 36 | stillbirth.mp. or Stillbirth/                                                                                                                                                                                                                                                                            | 9509    |
| 37 | neonatal death.mp. or Perinatal Death/                                                                                                                                                                                                                                                                   | 5079    |
| 38 | 35 or 36 or 37                                                                                                                                                                                                                                                                                           | 64116   |
| 39 | life expectancy.mp. or Life Expectancy/                                                                                                                                                                                                                                                                  | 37777   |
| 40 | quality of life.mp. or "Quality of Life"/                                                                                                                                                                                                                                                                | 299614  |
| 41 | 39 or 40                                                                                                                                                                                                                                                                                                 | 331242  |
| 42 | (abortion adj3 contracep*).mp. [mp=title, abstract, original title, name of substance word, subject heading word, keyword heading word, protocol supplementary concept word, rare disease supplementary concept word, unique identifier, synonyms]                                                       | 1422    |
| 43 | Pregnancy, Unwanted/ or unintended pregnancy.mp. or Pregnancy, Unplanned/                                                                                                                                                                                                                                | 5474    |

|    |                                                                                                                                                                                                                                                                               |        |
|----|-------------------------------------------------------------------------------------------------------------------------------------------------------------------------------------------------------------------------------------------------------------------------------|--------|
| 44 | 42 or 43                                                                                                                                                                                                                                                                      | 6735   |
| 45 | ((politic* adj3 (women or female*)))mp. [mp=title, abstract, original title, name of substance word, subject heading word, keyword heading word, protocol supplementary concept word, rare disease supplementary concept word, unique identifier, synonyms]                   | 211    |
| 46 | ((women or female*) adj3 representation adj3 politic*)mp. [mp=title, abstract, original title, name of substance word, subject heading word, keyword heading word, protocol supplementary concept word, rare disease supplementary concept word, unique identifier, synonyms] | 9      |
| 47 | ((women or female*) adj3 member* adj3 parliament)mp. [mp=title, abstract, original title, name of substance word, subject heading word, keyword heading word, protocol supplementary concept word, rare disease supplementary concept word, unique identifier, synonyms]      | 2      |
| 48 | 45 or 46 or 47                                                                                                                                                                                                                                                                | 215    |
| 49 | 13 or 14 or 15 or 16 or 17 or 18 or 19 or 20 or 21 or 22 or 23 or 24 or 25 or 26 or 27 or 28 or 29 or 30 or 48                                                                                                                                                                | 190551 |
| 50 | 34 or 38 or 41 or 44                                                                                                                                                                                                                                                          | 413919 |
| 51 | 12 and 49 and 50                                                                                                                                                                                                                                                              | 1710   |
| 52 | limit 51 to (english language and yr="1970 -Current")                                                                                                                                                                                                                         | 1548   |
| 53 | 13 or 14 or 15 or 16 or 17 or 18 or 19 or 20 or 21 or 22 or 23 or 24 or 25 or 26 or 27 or 28 or 29 or 30 or 45 or 46 or 47                                                                                                                                                    | 190551 |
| 54 | 12 and 34 and 53                                                                                                                                                                                                                                                              | 393    |
| 55 | limit 54 to (english language and yr="2000 - 2017")                                                                                                                                                                                                                           | 152    |
| 56 | 34 or 38                                                                                                                                                                                                                                                                      | 77851  |
| 57 | 12 and 53 and 56                                                                                                                                                                                                                                                              | 742    |
| 58 | limit 57 to (english language and yr="2000 - 2017")                                                                                                                                                                                                                           | 217    |
